# Supplementary material for: A one-step facile synthesis of fcc Ru–RuO 2 activates superior bifunctionality toward overall alkaline water splitting
Source: Royal Society of Chemistry journal article supplement (doi:10.1039/d4ta04967e), 2024-01-01
Supplement: d4ta04967e1.pdf [file d4ta04967e1.pdf]

*Electronic Supplementary Information*

**One-Step Facile Synthesis of *fcc* Ru-RuO<sub>2</sub> Activates Superior Bifunctionality toward Overall Alkaline Water Splitting**

*Qianqian Fan<sup>a</sup>, Yueyue Shao<sup>b</sup>, Longzhou Zhang<sup>\*c</sup>, Jia Zhou<sup>\*b</sup>, Guigen Wang <sup>\*a</sup>*

<sup>a</sup>Guangdong Provincial Key Laboratory of Semiconductor Optoelectronic Materials and Intelligent Photonic Systems, School of Materials Science and Engineering, Harbin Institute of Technology, Shenzhen, Shenzhen 518055, China

<sup>b</sup>State Key Laboratory of Urban Water Resource and Environment, School of Science, Harbin Institute of Technology, Shenzhen 518055, China

<sup>c</sup>Electron Microscope Center, Yunnan University, Kunming, 650091, China

These authors contributed equally to this work.

These authors contributed equally to this work.

## Figures

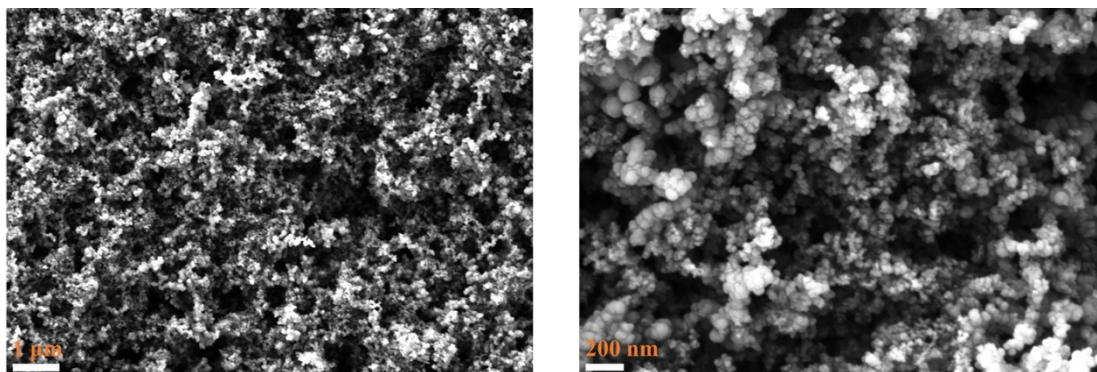

**Fig. S1.** SEM images of the pristine carbon black at different scales.

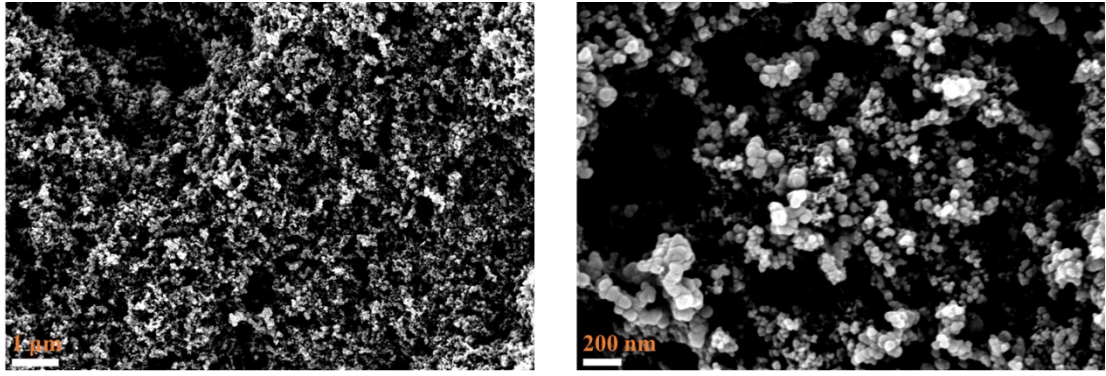

**Fig. S2.** SEM images of the Ru-RuO<sub>2</sub>/C at different scales.

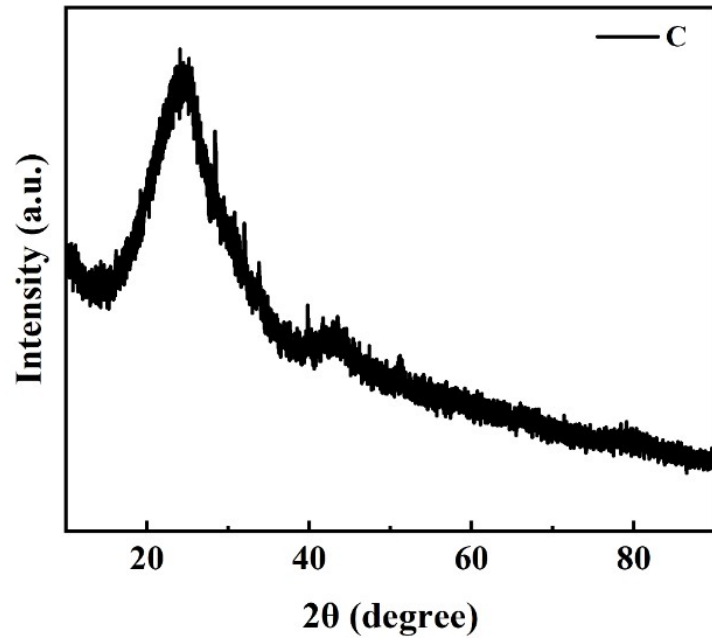

**Fig. S3.** XRD characterization of the conductive carbon black.

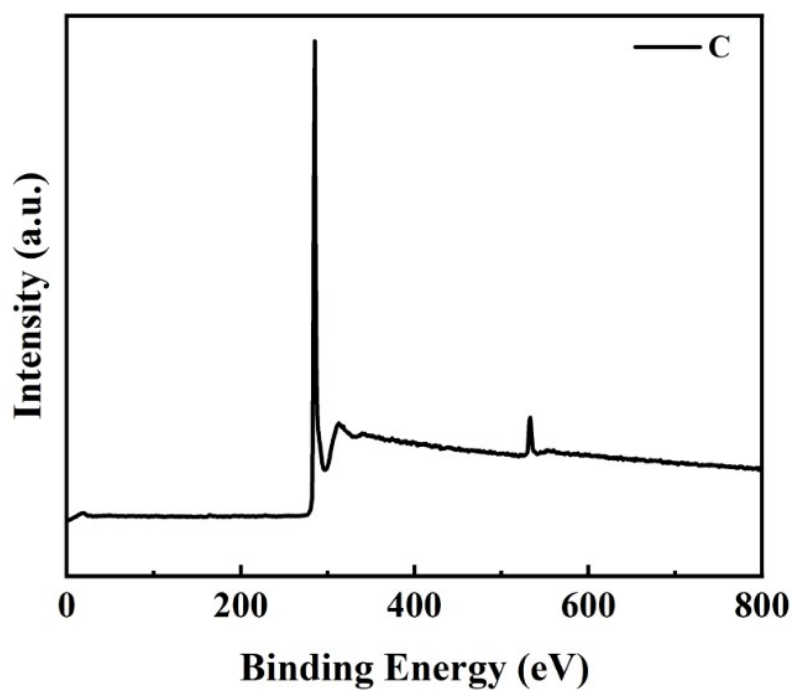

**Fig. S4.** The survey of High resolution XPS spectra of C

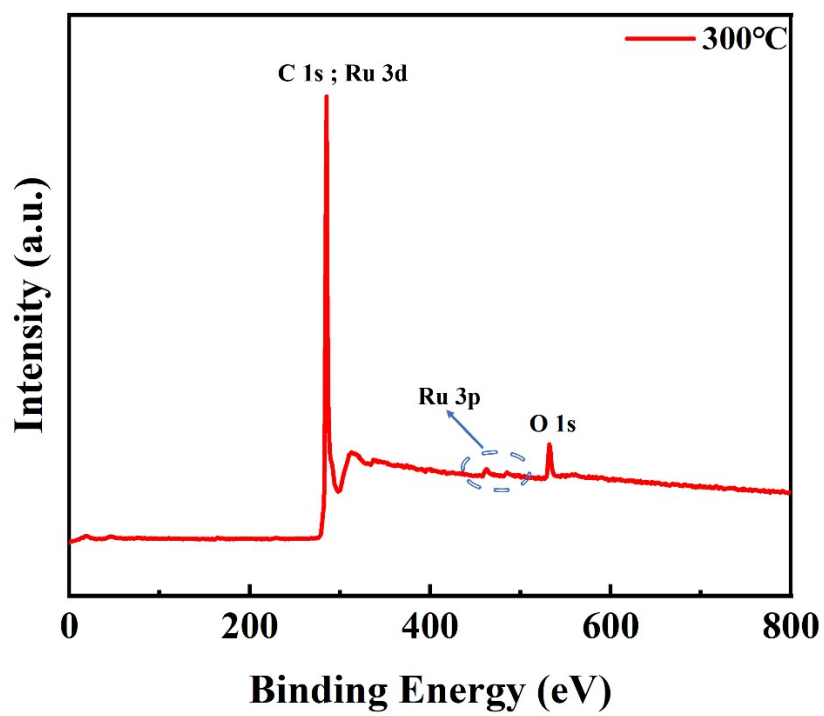

**Fig. S5.** The survey of High resolution XPS spectra of *fcc* Ru-RuO<sub>2</sub>/C.

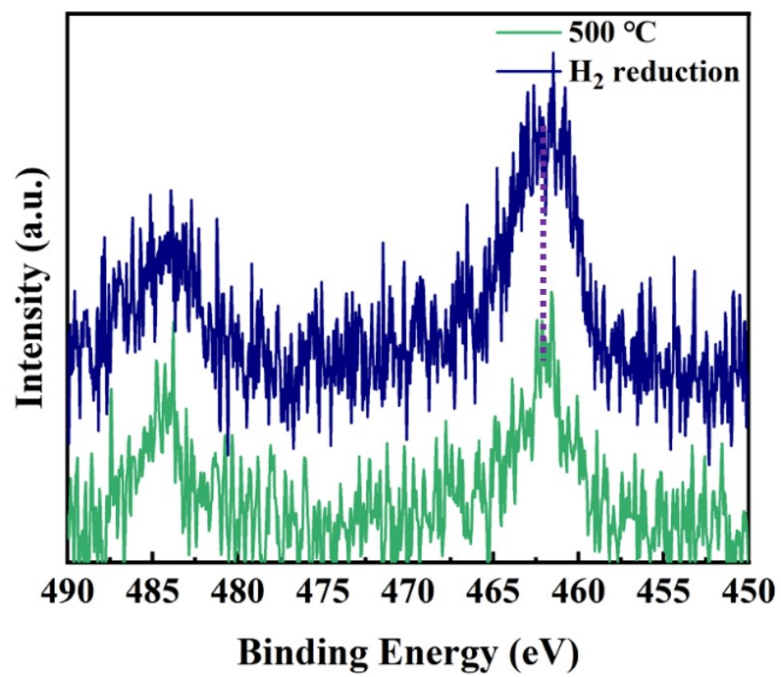

**Fig. S6.** XPS Ru 3p peaks of the 500°C and H<sub>2</sub> reduction.

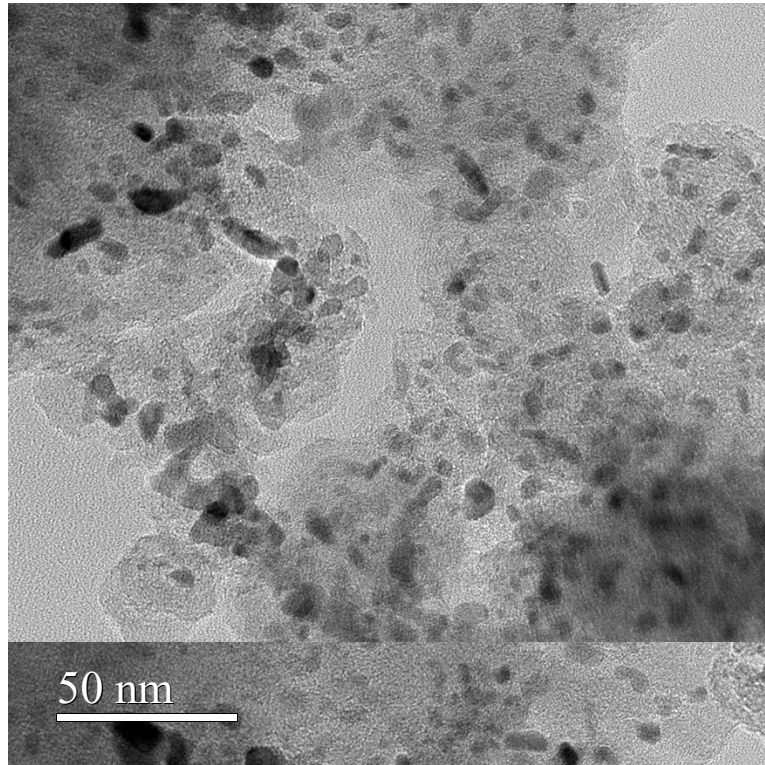

**Fig. S7.** High-magnification TEM image of the *fcc* Ru-RuO<sub>2</sub>/C.



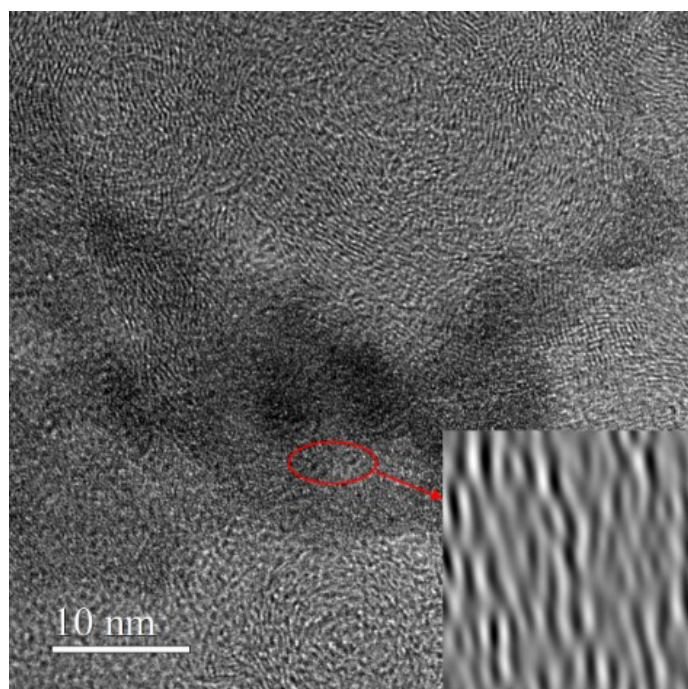

**Fig. S8.** High-magnification TEM image of the 200 °C.

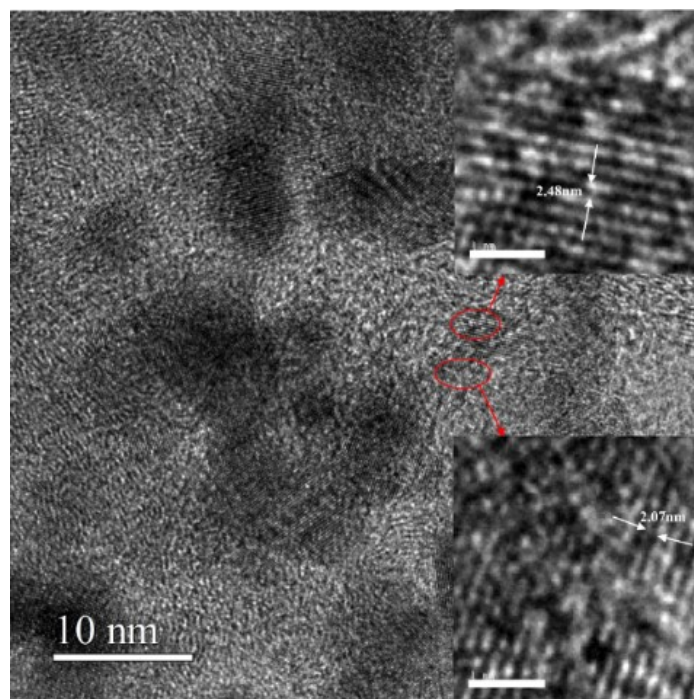

**Fig. S9.** High-magnification TEM image of the 400 °C.

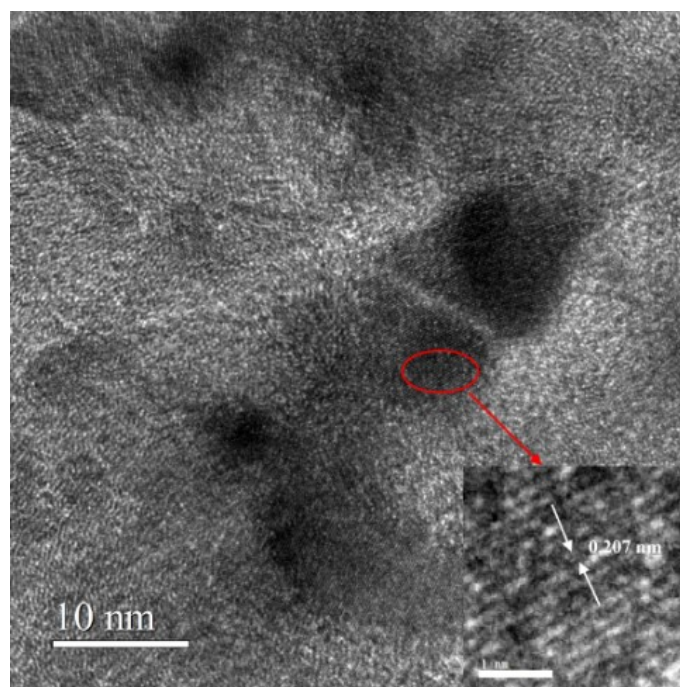

**Fig. S10.** High-magnification TEM image of the 500 °C.

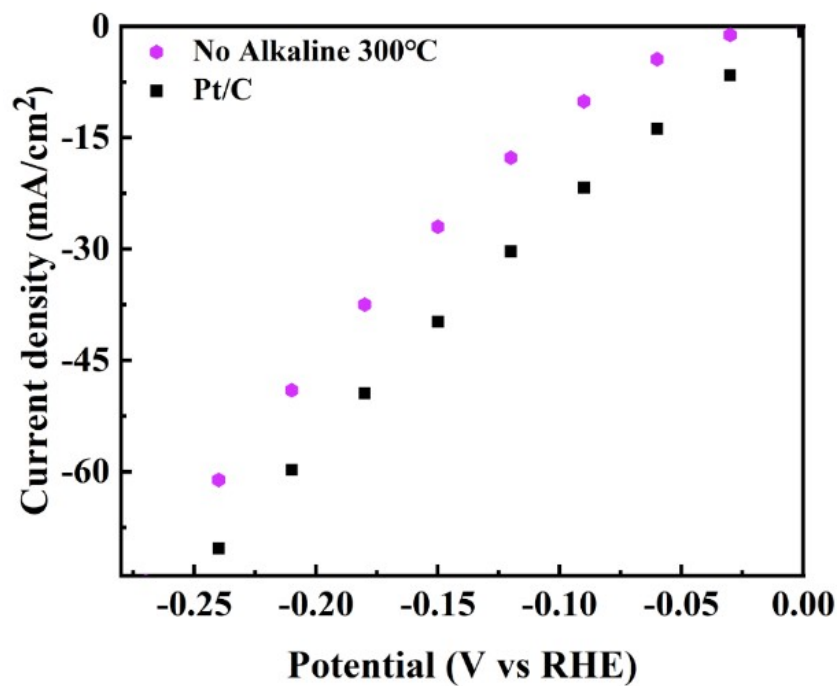

Fig. S11. Comparison of electrocatalytic HER performance of 20 % Pt/C.

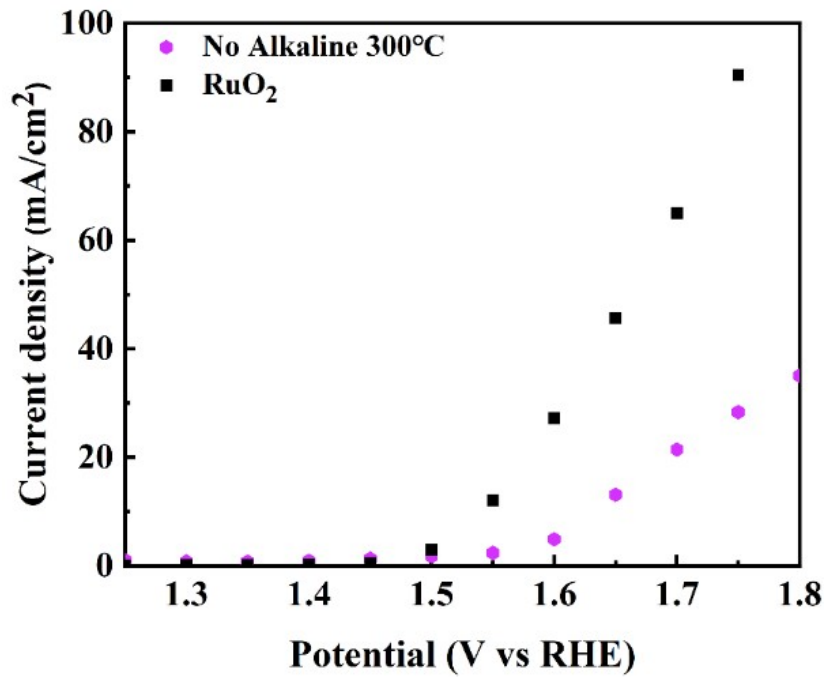

**Fig. S12.** Comparison of electrocatalytic OER performance of RuO<sub>2</sub>.

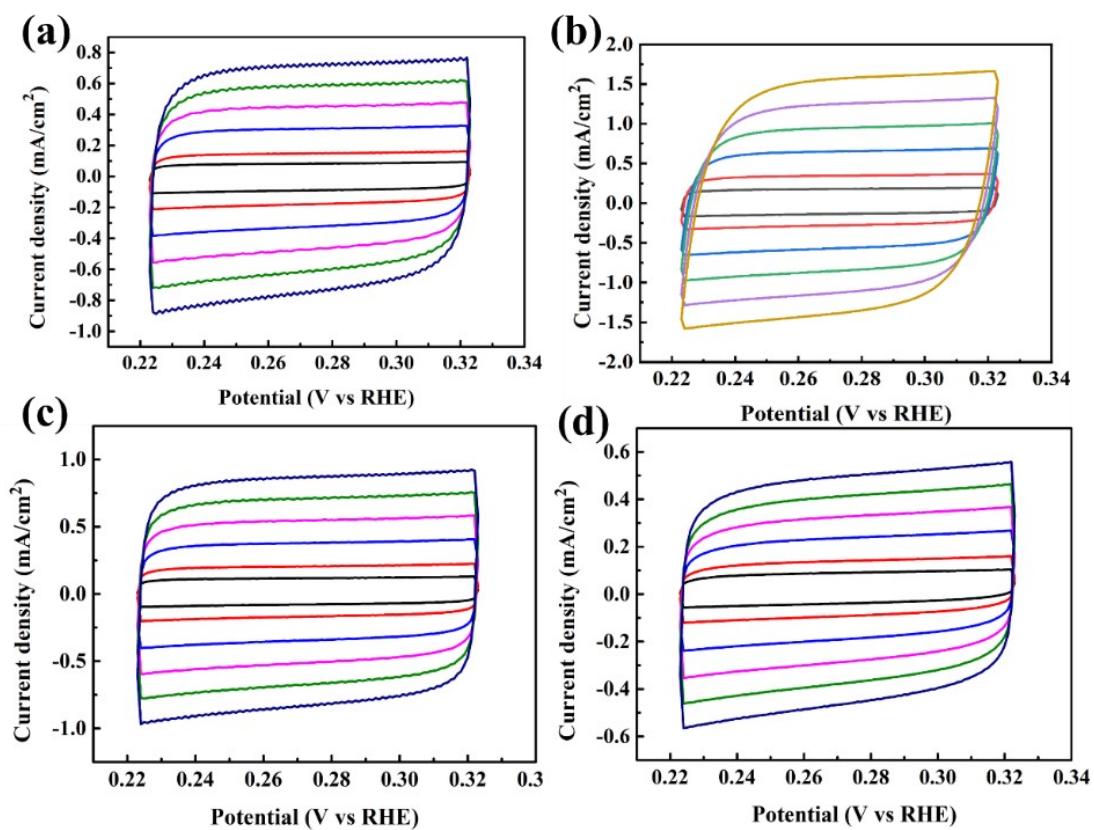

**Fig. S13.** Cyclic voltammety curves: (a) 200 °C, (b) 300 °C, (c) 400 °C and (d) 500 °C, tested under the potential window of 0 V-0.1 V vs. RHE under different scan rates.

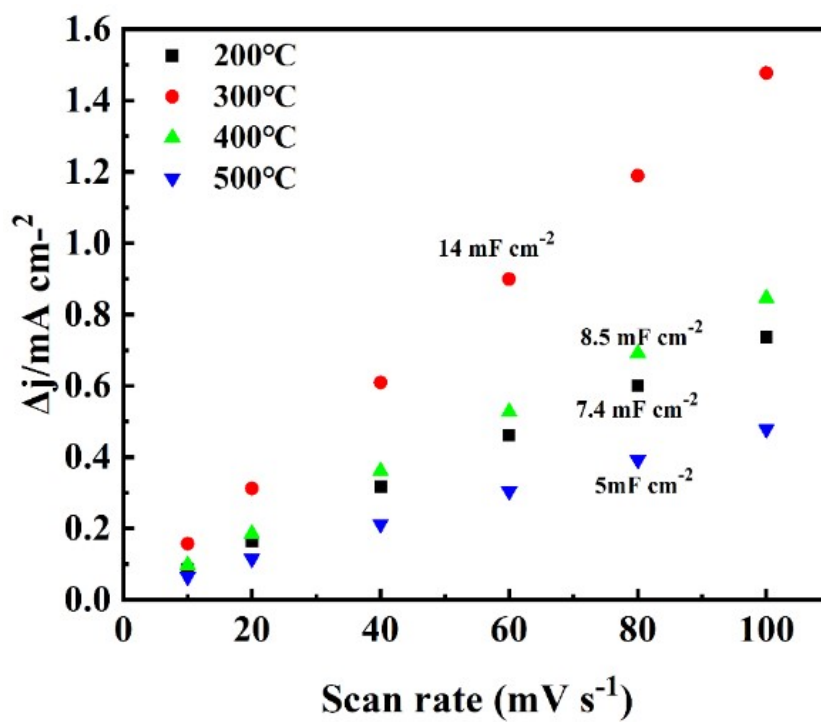

**Fig. S14.** Electrochemical double-layer capacitances ( $C_{dl}$ ) at different annealing temperatures.

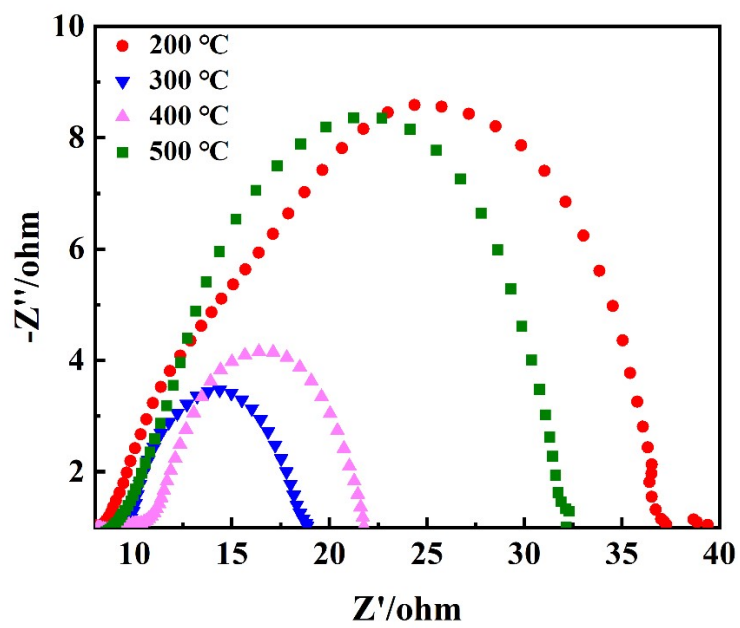

**Fig. S15.** EIS Nyquist plots at different annealing temperatures.



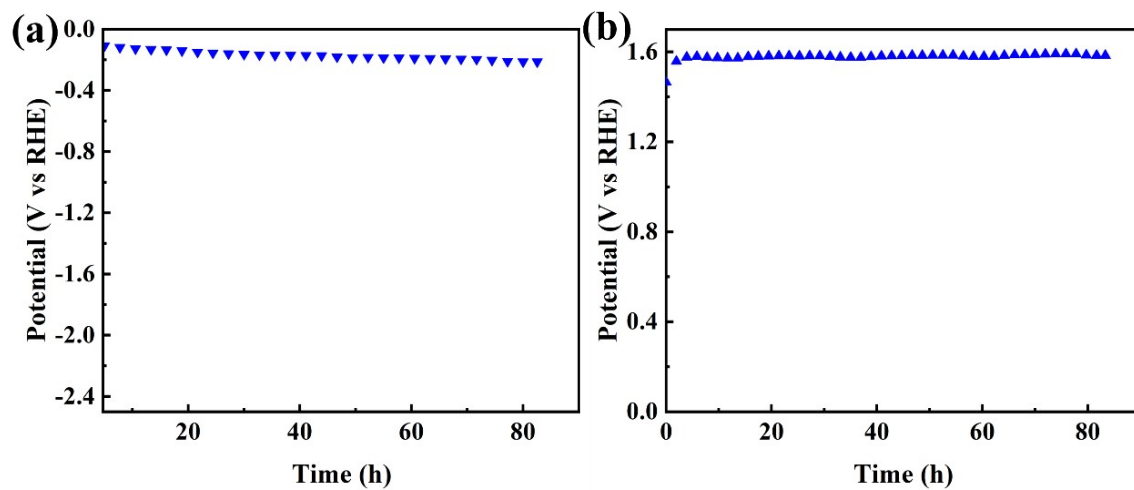

**Fig. S16.** (a) HER and (b) OER stability of *fcc* Ru-RuO<sub>2</sub>/C, respectively.

**Table S1.** Comparison of the overpotential of the OER, HER, and OWS over *fcc* Ru-RuO<sub>2</sub>/C with the reported noble metal electrocatalysts at 10 mA cm<sup>-2</sup> under alkaline solution.

| Catalyst                                    | $\eta_{10}$ (mV) |            | References                                                         |
|---------------------------------------------|------------------|------------|--------------------------------------------------------------------|
|                                             | HER              | OER        |                                                                    |
| <b><i>Fcc</i> Ru-RuO<sub>2</sub>/C</b>      | <b>30</b>        | <b>283</b> | <b>This Work</b>                                                   |
| <i>Ru<sub>1</sub>Ni<sub>1</sub>-NCFs</i>    | 35               | 290        | Adv. Sci. 2020, 7, 1901833. <sup>[1]</sup>                         |
| Ru $\Delta$ c $\rightarrow$ h/C             | 41               | /          | Adv. Mater. 2021, 33, 2105248. <sup>[2]</sup>                      |
| RuSe <sub>2</sub> /CNTs-650                 | 44               | /          | J. Mater. Chem. A 2022, 10, 7637. <sup>[3]</sup>                   |
| Ru-Ni(OH) <sub>2</sub>                      | /                | 295        | Chem. Eng. J. 2022, 429, 132478. <sup>[4]</sup>                    |
| RuOx-nc@Co <sub>3</sub> O <sub>4</sub> -250 | /                | 280        | Energy Storage Mater. 2020, 32, 20-29. <sup>[5]</sup>              |
| MoOx-Ru <i>fcc</i>                          | 20               | /          | ACS Nano 2022, 16,14885–14894. <sup>[6]</sup>                      |
| Ru-H <sub>2</sub> O/CC                      | 44               | 270        | Applied Catalysis B: Environmental 317(2022)121729. <sup>[7]</sup> |
| PtSe <sub>2</sub> /Pt                       | 42               | /          | Angew. Chem. Int. Ed. 2021, 60, 23388. <sup>[8]</sup>              |
| 3D RhSe <sub>2</sub>                        | 81               | /          | Adv. Mater. 2021, 33, 2007894. <sup>[9]</sup>                      |

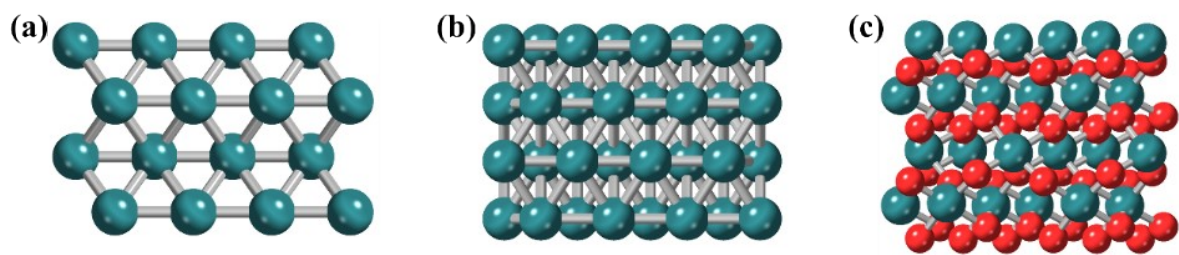

**Fig. S17.** The geometric structure.(a) *fcc* Ru (b) *hcp* Ru and (c) RuO<sub>2</sub>.

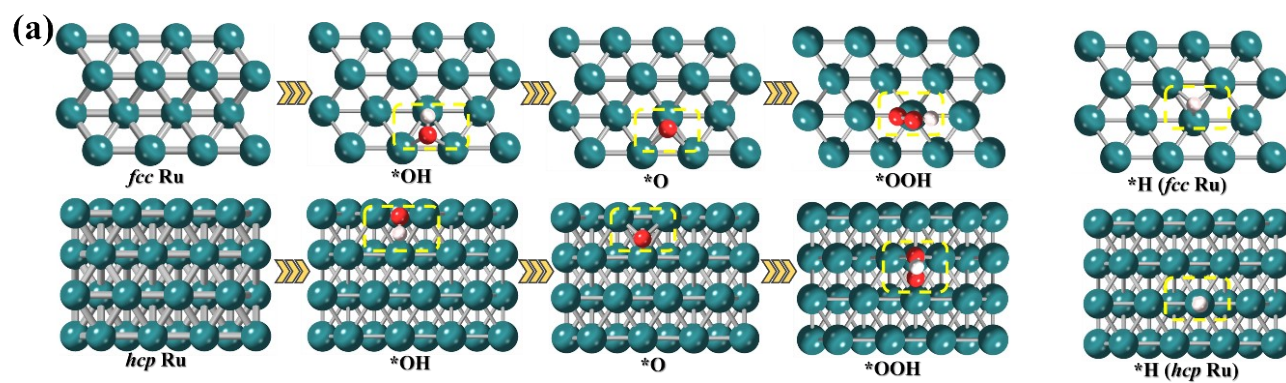

**Fig. S18.** The theoretical study. (a) Schematic illustration of the atomic structures of intermediate adsorption on *fcc* Ru and *hcp* Ru during HER and OER process.

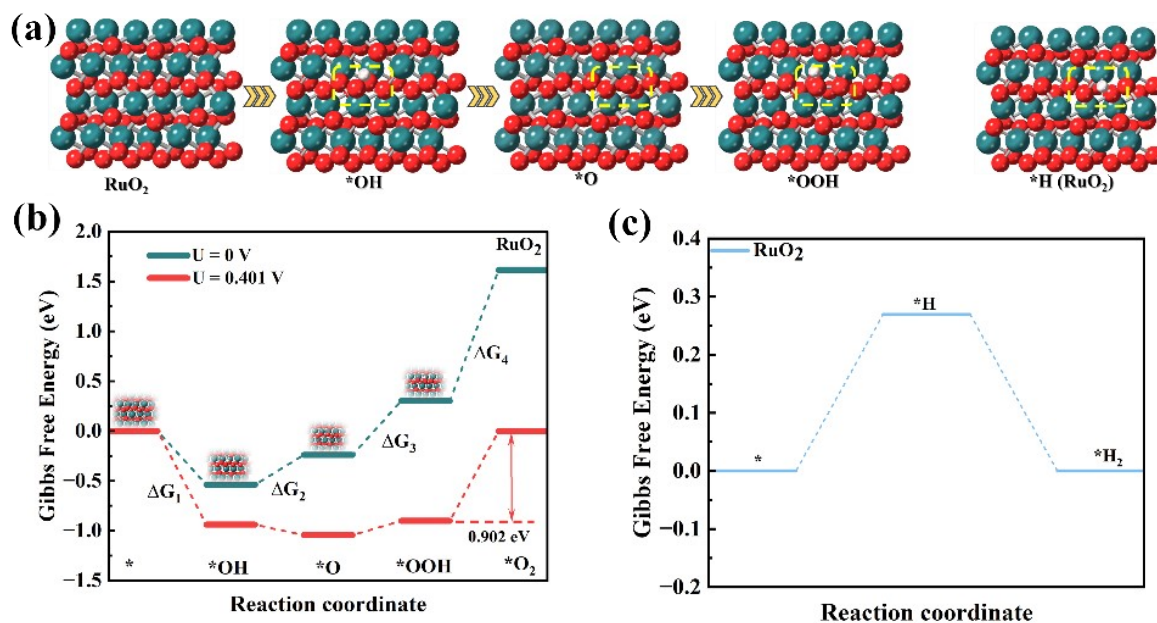

**Fig. S19.** The theoretical study. (a) Schematic illustration of the atomic structures of intermediate adsorption on RuO<sub>2</sub> during HER and OER process. (b, c) The calculated corresponding free-energy diagram of the HER and OER.

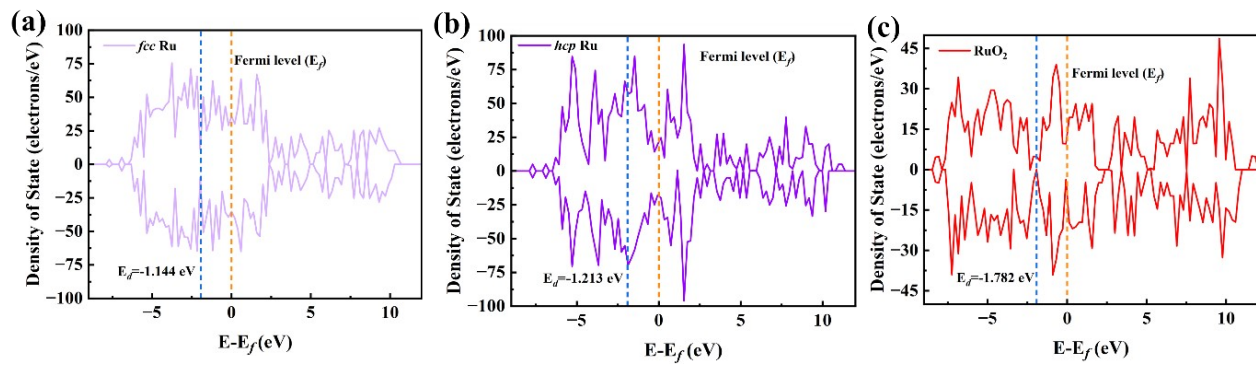

**Fig. S20.** The d-band centers of (a) *fcc* Ru. (b) *hcp* Ru. (c)  $\text{RuO}_2$ .

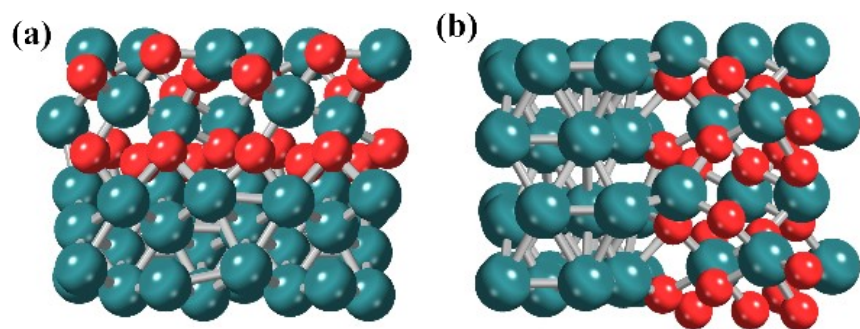

**Fig. S21.** The geometric structure of *fcc* Ru- RuO<sub>2</sub> and *hcp* Ru- RuO<sub>2</sub>.

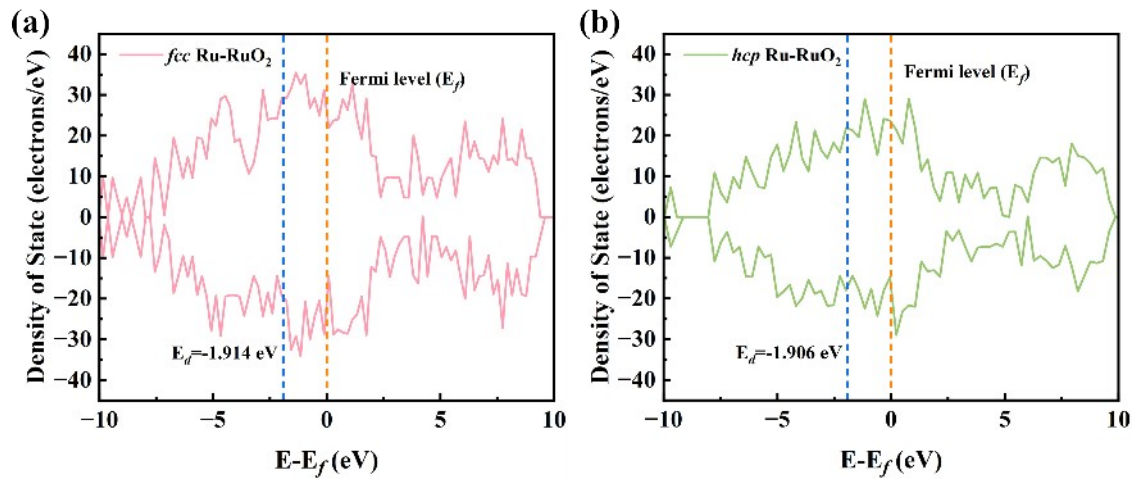

**Fig. S22.** Projected DOS and d band of *fcc* Ru- RuO<sub>2</sub> and *hcp* Ru- RuO<sub>2</sub>.



## References

- [1] M. Li, H. Wang, W. Zhu, W. Li, C. Wang and X. Lu. *Adv. Sci.* **2020**, *7*, 1901833.
- [2] J. Kim, H. J. Kim, B. Ruqia, M. J. Kim, Y.-J. Jang, T. H. Jo, H. Baik, H.-S. Oh, H.-S. Chung, K. Baek, S. Noh, M. Jung, K.-j. Kim, H.-K. Lim, Y.-S. Youn and S.-I. Choi. *Adv. Mater.* **2021**, *33*, 2105248.
- [3] D. Chen, R. Lu, Y. Yao, D. Wu, H. Zhao, R. Yu, Z. Pu, P. Wang, J. Zhu, J. Yu, P. Ji, Z. Kou, H. Tang and S. Mu. *J. Mater. Chem. A.* **2022**, *10*, 7637.
- [4] R. Guo, W. Shi, Wenzhu Liu, X. Yang, Y. Xie, T. Yang and J. Xiao. *Chem. Eng. J.* **2022**, *429*, 132478.
- [5] Q. Lu, Y. Guo, P. Mao, K. Liao, X. Zou, J. Dai, P. Tan, R. Ran, W. Zhou, M. Ni and Z. Shao. *Energy Storage Mater.* **2020**, *32*, 20.
- [6] L. Li, C. Liu, S. Liu, J. Wang, J. Han, T. S. Chan, Y. Li, Z. Hu, Q. Shao, Q. Zhang and X. Huang. *ACS Nano.* **2022**, *16*, 14885.
- [7] M. You, X. Du, X. Hou, Z. Wang, Y. Zhou, H. Ji, L. Zhang, Z. Zhang, S. Yi and D. Chen. *Applied Catalysis B: Environmental.* **2022**, *317*, 121729.
- [8] Z. Wang, B. Xiao, Z. Lin, Y. Xu, Y. Lin, F. Meng, Q. Zhang, L. Gu, B. Fang, S. Guo and W. Zhong. *Angew. Chem. Int. Ed.* **2021**, *60*, 23388.
- [9] W. Zhong, B. Xiao, Z. Lin, Z. Wang, L. Huang, S. Shen, Q. Zhang and L. Gu. *Adv. Mater.* **2021**, *33*, 2007894.
